# Supplementary material
Source: PubMed Central journal article supplement (PMC2860887)
Supplement: ddq062_1.pdf [file ddq062_1.pdf]

## SUPPLEMENTAL MATERIAL

### **Genome-wide association study of homocysteine levels in Filipinos provides evidence for *CPS1* in women and a stronger *MTHFR* effect in young adults**

Leslie A. Lange<sup>1</sup>, Damien C. Croteau-Chonka<sup>1</sup>, Amanda F. Marvelle<sup>1</sup>, Li Qin<sup>1</sup>, Kyle J. Gaulton<sup>1</sup>, Christopher W. Kuzawa<sup>2</sup>, Thomas W. McDade<sup>2</sup>, Yunfei Wang<sup>1,3</sup>, Yun Li<sup>1,3</sup>, Shawn Levy<sup>4</sup>, Judith B. Borja<sup>5</sup>, Ethan M. Lange<sup>1,3</sup>, Linda S. Adair<sup>6</sup>, Karen L. Mohlke<sup>1</sup>

1) Department of Genetics, University of North Carolina, Chapel Hill, NC, 27599, USA; 2) Department of Anthropology and the Institute for Policy Research, Northwestern University, Evanston, IL, 60208, USA; 3) Department of Biostatistics, University of North Carolina, Chapel Hill, NC, 27599, USA; 4) Department of Biomedical Informatics, Vanderbilt University, Nashville, TN, 37232, USA; 5) Office of Population Studies Foundation, University of San Carlos, Cebu City 6000, Philippines; 6) Department of Nutrition, University of North Carolina, Chapel Hill, NC, 27599, USA

**Supplemental Table 1: Descriptive characteristics of n=1,786 CLHNS mothers**

|                                         | Mean (range) or %     | Standard deviation or N |
|-----------------------------------------|-----------------------|-------------------------|
| Homocysteine (mmol/L)                   | 11.4 (5 – 36)         | 3.0                     |
| Age (years)                             | 48.5 (35 – 69)        | 6.1                     |
| Number of previous pregnancies          |                       |                         |
| 1 – 4                                   | 27.9%                 | 499                     |
| 5 – 10                                  | 60.9%                 | 1,087                   |
| 11+                                     | 11.2%                 | 200                     |
| Post-menopausal                         | 38%                   | 685                     |
| Body mass index (kg/m <sup>2</sup> )    | 24.3 (12 – 42)        | 4.4                     |
| Affected with diabetes                  | 5%                    | 89                      |
| Folate intake (µg/day)                  | 312.6 (4.2 – 1,405.7) | 165.0                   |
| Vitamin B <sub>6</sub> intake (mg/day)  | 0.99 (0.07 – 4.77)    | 0.53                    |
| Vitamin B <sub>12</sub> intake (µg/day) | 4.44 (0.03 – 42.78)   | 0.11                    |

**Supplemental Table 2: Descriptive characteristics of n=1,679 offspring**

|                                         | Mean (range) or %     | Standard deviation or N |
|-----------------------------------------|-----------------------|-------------------------|
| Age                                     | 21.5 (20.8 – 22.3)    | 0.3                     |
| <b>Males</b>                            | 54.8%                 | 920                     |
| Homocysteine                            | 14.4 (6 – 66)         | 5.6                     |
| Body mass index                         | 21.1 (14 – 40)        | 3.1                     |
| Folate intake (µg/day)                  | 577.8 (11.6 – 1845.9) | 285.8                   |
| Vitamin B <sub>6</sub> intake (mg/day)  | 1.95 (0.16 – 9.83)    | 1.00                    |
| Vitamin B <sub>12</sub> intake (µg/day) | 8.40 (0.05 – 107.44)  | 7.38                    |
| <b>Females</b>                          | 44.2%                 | 759                     |
| Homocysteine                            | 10.7 (6 – 48)         | 3.0                     |
| Body mass index                         | 20.4 (14 – 41)        | 3.3                     |
| Folate intake (µg/day)                  | 362.5 (5.8 – 2178.1)  | 206.3                   |
| Vitamin B <sub>6</sub> intake (mg/day)  | 1.52 (0.06 – 6.38)    | 0.84                    |
| Vitamin B <sub>12</sub> intake (µg/day) | 6.16 (0.19 – 55.61)   | 5.54                    |

**Supplemental Table 3: Association results for CPS1 SNP rs7422339 with cardiovascular disease risk factors**

|                                      | Mean (SD)    |              |              | <i>P</i> |
|--------------------------------------|--------------|--------------|--------------|----------|
|                                      | CC           | CA           | AA           |          |
| Total cholesterol                    | 184.9 (40.6) | 189.0 (36.5) | 190.8 (43.5) | 0.0094   |
| High-density lipoprotein cholesterol | 41.1 (10.4)  | 40.8 (10.4)  | 39.6 (11.0)  | 0.56     |
| Low-density lipoprotein cholesterol  | 117.5 (34.3) | 122.1 (32.6) | 125.1 (35.9) | 0.0010   |
| Triglycerides                        | 132.1 (97.2) | 129.8 (67.6) | 126.0 (57.1) | 0.48     |
| C-reactive protein                   | 2.7 (6.1)    | 2.4 (5.1)    | 2.7 (8.2)    | 0.29     |
| Fasting glucose                      | 116.7 (34.8) | 119.1 (40.5) | 112.6 (20.5) | 0.89     |
| Body mass index                      | 24.3 (4.4)   | 24.3 (4.4)   | 24.3 (4.3)   | 0.84     |

**Supplemental Table 4: Association of log-Hcy and covariates considered, including 10 principal components from EIGENSOFT analysis of population structure**

| Covariate                      | <i>P</i>              |
|--------------------------------|-----------------------|
| Age                            | $3.7 \times 10^{-18}$ |
| Number of previous pregnancies | 0.0059                |
| Menopause status               | $1.0 \times 10^{-21}$ |
| Principal components           |                       |
| 1                              | 0.89                  |
| 2                              | 0.0007                |
| 3                              | 0.0055                |
| 4                              | 0.96                  |
| 5                              | 0.21                  |
| 6                              | 0.98                  |
| 7                              | 0.45                  |
| 8                              | 0.058                 |
| 9                              | 0.86                  |
| 10                             | 0.23                  |

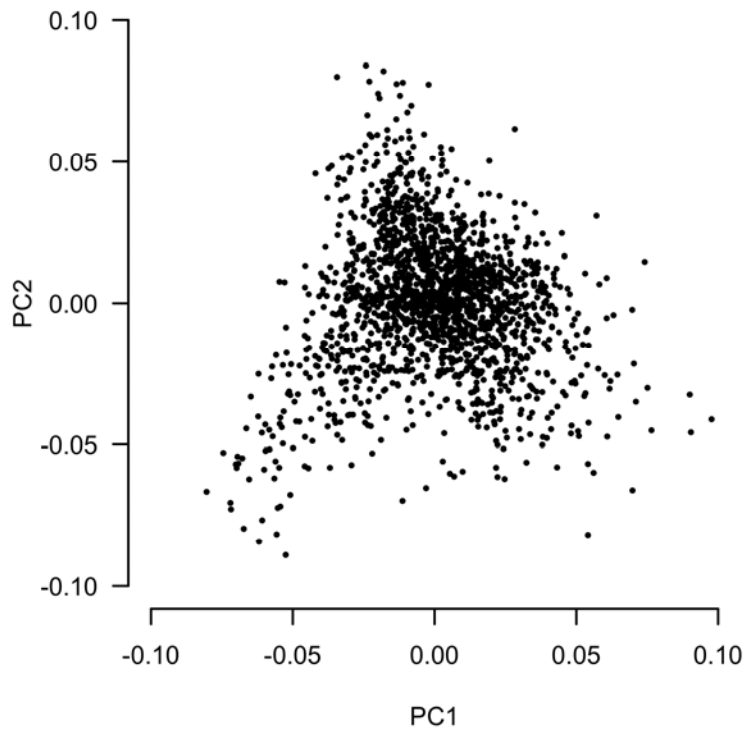

**Supplemental Figure 1: Limited extent of genetic heterogeneity in CLHNS mothers.**

Plot of first two principal components measuring extent of genetic heterogeneity. Principle components are based on 1,571 CHLNS subjects with estimated cumulative pair-wise identity-by-descent  $< 0.1$  using 13,972 independent SNPs (estimated  $r^2 < 0.005$  between all pairs of SNPs within 1 Mb) with observed MAF  $> 0.05$ .
